1 **Density dependent interactions during growth mask the effect of interactions during**  
2 **flowering in pollinator-sharing annual plants**

3

4 Running head: Density dependence in growth and flowering

5

6

7 Keywords: community ecology, density dependence, species interactions, pollination ecology,  
8 pollinator-mediated interactions, plant interactions, pollinator foraging

9 Main text word count: 6720 (initial: 6993)

10 Abstract word count: 200

11 **Abstract**

12 Density dependent interactions are fundamental to community ecology, but studies often reduce  
13 the complex nature of species interactions. In plant ecology, interactions during vegetative  
14 growth and flowering are often considered separately, though both can affect reproductive  
15 output. Here we use communities of annual flowering plants in the genus *Clarkia* to ask how  
16 interactions during growth and flowering contribute to density dependence in plant seed  
17 production, and if pollinator behaviors explain apparent patterns in plant interactions during  
18 flowering. We measure seed set (seed number per ovule) and total fecundity (whole-plant seed  
19 production) of *Clarkia* focal plants in experimental interaction plots with the effect of pollinators  
20 experimentally removed through supplemental pollination or retained. We also observe  
21 pollinator behaviors in the plots and experimental arrays to document pollinator preference,  
22 constancy and joint attraction. During flowering, pollinators significantly changed the density  
23 dependent effects of *Clarkia* interactions on seed set in 31% of species interactions, and these  
24 changes corresponded to pollinator behaviors. Total fecundity, however, did not depend on  
25 interactions between *Clarkia*; instead, earlier-flowering, non-*Clarkia* forbs limited total fecundity.  
26 Our study shows that interactions during vegetative growth can preclude the effect of pollinator-  
27 mediated interactions on fecundity by limiting potential reproductive output. Simultaneously  
28 studying different types of species interactions allows for understanding the contingency of  
29 ecological outcomes.

## 30 **Introduction**

31 Density dependent interactions shape population dynamics and community structure. In  
32 communities, co-occurring species are typically engaged in multiple types of interactions within  
33 and between trophic levels that can affect density dependence (e.g., plant-plant resource  
34 competition and pollinator-mediated plant interactions). Typically, studies aimed at quantifying  
35 the strength and magnitude of density dependent interactions either estimate the combined  
36 effects of multiple interaction types on performance or focus on a single interaction type  
37 (Losapio et al. 2019). For example, studies in plant community ecology estimate the effects of  
38 species interactions on coexistence (e.g. Angert et al. 2009, Godoy et al. 2014, Kraft et al. 2015,  
39 Bimler et al. 2018, Wainwright et al. 2019), but do not parse the contribution of plant-plant  
40 interactions during vegetative growth from the effects of pollinator-mediated interactions during  
41 flowering (but see Lanuza et al. 2018 for an example of how variation in pollination affects  
42 pairwise coexistence dynamics). Conversely, recent work in pollination ecology demonstrates  
43 that pollinator-mediated plant interactions are key to understanding seed production and density  
44 dependence (Lázaro et al. 2014, Benadi & Pauw 2018, Bergamo et al. 2020, Opedal & Hegland  
45 2020, Phillips et al. 2020), but rarely do these studies investigate how interactions during  
46 vegetative growth also contribute to seed production. On one hand, the ‘combined effects’  
47 approach cannot identify how interaction types combine to determine overall patterns in density  
48 dependence, which lowers its predictive value. The ‘single interaction’ approach, on the other  
49 hand, assumes that only one interaction type is relevant for reproductive output and therefore  
50 may overestimate its importance, which lowers the explanatory value. One way to unite these  
51 two approaches in plant ecology is to quantify density dependence arising from interactions  
52 during growth and flowering and determine their relative contributions to seed production. This  
53 should illuminate the ways in which interactions during these two life stages might combine to  
54 affect plant species’ performance, population persistence, and coexistence (Bartomeus et al.  
55 2021).

56  
57 For plant species that grow together and share pollinators, density dependent interactions  
58 during vegetative growth determine plant survivorship, size, and potential fecundity (e.g., flower  
59 and ovule production). Interactions during the reproductive stage determine whether flowers are  
60 pollinated and produce seed. Whereas the mechanisms driving interactions during vegetative  
61 growth have been widely explored (e.g. Dybzinski & Tilman 2007), pollinator-mediated  
62 interactions during flowering are less understood. Two aspects of pollinator foraging behavior,  
63 pollinator preference and constancy, have the potential to explain the effect of pollinator  
64 mediated interactions on seed set. Preference reflects a pollinator's choice in visiting one plant  
65 species over others when all are available and can introduce or intensify competition between  
66 plant species by affecting the quantity of conspecific pollen that plants receive. Conspecific  
67 pollen receipt and seed set for a particular plant should decline with declining pollinator  
68 preference (Pauw 2012, Song & Feldman 2014, Benadi 2015). Constancy is the tendency of  
69 pollinators to visit one species of plant in a foraging bout. If pollinators are inconstant, they can  
70 introduce incompatible, heterospecific pollen to co-flowering plants. Heterospecific pollen  
71 transfer is widespread in plant communities and is a form of reproductive interference between  
72 plant species that decreases seed set (Morales & Traveset 2008, Arceo-Gómez et al. 2016,  
73 Arceo-Gómez et al. 2019, Moreira-Hernández & Muchhala 2019). Plant interactions via shared  
74 pollinators can also be facilitative. Patches of many co-flowering plants may attract more  
75 pollinators than when growing alone, which can increase pollinator visitation rates and thus  
76 pollination service; this phenomenon is known as joint attraction (Kunin & Iwasa 1996, Moeller  
77 2004, Feldman et al. 2004, Bizecki Robson 2013). The potential for facilitation via joint attraction  
78 is contingent on low interspecific pollen transfer, and thus high pollinator constancy. Lastly,  
79 because different pollinator taxa exhibit different degrees of preference and constancy (Waser  
80 et al. 1996; e.g. Eckhart et al. 2006, Barrios et al. 2016), the composition of the pollinator

81 community will also modulate the extent to which pollinator-mediated interactions affect plant  
82 reproduction.

83

84 Studies of in natural plant-pollinator communities (Lanuza et al. 2018) and small mesocosms of  
85 plant and pollinator species (Bartomeus et al. 2021) confirm the importance of examining plant-  
86 plant interactions during both vegetative growth and flowering. However, no experimental study  
87 has quantified the relationship between density dependence arising from interactions during  
88 vegetative growth versus flowering, nor demonstrated the link between pollinator-mediated  
89 interactions during flowering and pollinator foraging behavior. In this study, we do both in a  
90 group of four sympatric and co-flowering winter annuals in the genus *Clarkia* (Onagraceae).  
91 The four *Clarkia* species commonly co-occur throughout their range of geographic overlap  
92 (Eisen & Geber 2018) and share bee pollinators specialized on the genus (MacSwain et al.  
93 1973, Moeller 2005, Singh 2014), suggesting that they interact during both vegetative growth  
94 and flowering. Furthermore, because *Clarkia* species flower late in the season after almost all  
95 other annual plants in the area have senesced, the main interaction during flowering is through  
96 pollinators that they share with each other (MacSwain et al. 1973).

97

98 To investigate the separate and combined effects of density dependent interactions during  
99 growth and flowering on plant reproductive success, we use experimental pairwise interaction  
100 plots of sown *Clarkia* and pollen supplementation via hand pollination (Figure 1). In the pairwise  
101 interaction plots, interactions during growth affect plant size, and hence reproductive potential,  
102 while interactions via shared pollinators during flowering affect pollination and seed set. The  
103 pollen supplementation alleviates any effect of pollen limitation to seed set, allowing the effect of  
104 interactions during growth to be separated from the effect of pollinator-mediated interactions  
105 during flowering. We also investigate the link between pollinator behavior and *Clarkia*  
106 interactions during flowering using pollinator observations in our experimental interaction plots,

107 and in experimental floral arrays, to measure pollinator preference, constancy, and visitation  
108 rate in response to floral density.

109

## 110 **Methods**

### 111 ***Natural history***

112 *Clarkia* is a genus of winter annual plants which germinate in late winter and grow over the  
113 course of the spring. All *Clarkia* species are self-compatible, but 2/3 of the species are  
114 predominantly outcrossing due to pronounced spatial separation (herkogamy) of anthers and  
115 stigmas within flowers and temporal separation (protandry) between anther dehiscence and  
116 stigma maturation (Lewis & Lewis 1955). All four *Clarkia* taxa in this study (*C. cylindrica* ssp.  
117 *clavicarpa* (Jeps.) Lewis & Lewis, *C. speciosa* ssp. *polyantha* Lewis & Lewis, *C. unguiculata*  
118 Lindl., *C. xantiana* ssp. *xantiana* A. Gray, family Onagraceae) exhibit pronounced herkogamy  
119 and protandry, and in the two taxa where outcrossing rates have been measured, outcrossing  
120 rates range from 0.53-0.95 in *C. xantiana* ssp. *xantiana* (Moeller et al. 2012; Hove et al. 2016)  
121 and 0.80-0.94 in *C. unguiculata* (Hove et al. 2016). In the remainder of the paper, we drop  
122 subspecies designations and refer to the four taxa as species.

123

124 The four *Clarkia* species are sympatric in the southernmost portion of the Sierra Nevada  
125 Mountain range. This region and our study are on Tübatulabal land known commonly as the  
126 Kern River Canyon (KRC; Kern County, California, USA). We pay our respects to the  
127 Tübatulabal people and recognize their past and ongoing connection to the land and its ecology.  
128 The *Clarkia* in the KRC co-occur in communities of varying congeneric composition (from one to  
129 four *Clarkia* species) embedded in low-elevation grassland, chaparral, and oak woodlands. In  
130 their range of sympatry, *Clarkia* begin to flower in early May, and flowering lasts until mid- to late  
131 June. All four species overlap in flowering time for about two weeks in late May and share a  
132 group of bee pollinators specialized on the genus rather than any one species (MacSwain et al.

133 1973, Singh 2014). Pollen limitation to reproduction has been found in *C. xantiana* (Moeller et  
134 al. 2012, Hove et al. 2016) and *C. cylindrica* (Eisen et al. 2020), but not *C. unguiculata* (Hove et  
135 al. 2016). Where present, pollen limitation is variable across sites and years (Moeller et al.  
136 2012, Hove et al. 2016, Eisen et al. 2020). Research has shown that at least one species, *C.*  
137 *xantiana*, has higher seed set when it grows in multi-species *Clarkia* communities than at sites  
138 where it occurs alone, and that this effect is explained by increased visitation from shared  
139 pollinators at multi-species sites (Moeller 2004).

140

141 We use two different experiments to understand how pollinator-mediated interactions factor into  
142 interactions between *Clarkia*. First, we use an *in-situ* common garden experiment to determine  
143 (1) how focal *Clarkia* seed production and total fecundity respond to variation in neighborhood  
144 density; (2) how pollinator-mediated interactions contributed to patterns in observed density-  
145 dependence; and (3) pollinator preference and joint attraction. Because pollinator constancy  
146 was impossible to estimate in pairwise interaction plots due to low species richness, we  
147 additionally recorded pollinator visitation in multi-species experimental arrays of *Clarkia* plants to  
148 estimate pollinator constancy.

149

## 150 ***Experimental Design***

### 151 *Pairwise Interaction Plots*

152 Interactions during growth and flowering

153

154 To determine the combined effects of *Clarkia* growing and flowering together on reproductive  
155 success, we used an experimental design closely modeled after work done to estimate  
156 competitive interactions in annual plant communities (Godoy & Levine 2014, Godoy et al. 2014,  
157 Kraft et al. 2015, Wainwright et al. 2019). In short, seeds of one *Clarkia* species were sown into  
158 a plot as a competitive background, and then seeds of the same and different *Clarkia* species

159 were sown as focal plants (Figure 1A, B). The identity of the background *Clarkia* species, and  
160 the density of background *Clarkia* varied across plots. This allowed us to estimate the effect of  
161 increasing density of background *Clarkia* on focal plant fecundity for each pair of focal species  
162 and background species.

163

164 In the pairwise interaction plots, we measured two metrics of reproductive success on focal  
165 *Clarkia* plants in response to neighborhood density. First, we measured seed set as the success  
166 of converting ovules in a fruit into seeds (number of seeds per ovule or the proportion of ovules  
167 that result in filled seed) (Figure 1C). This metric is determined by interactions that occur during  
168 pollination. Second, we measured total fecundity, or the total number of filled seeds produced  
169 by a plant (Figure 1C), determined by interactions over the entire lifespan of the plant. Total  
170 fecundity is the product of the total number of ovules a plant produces, which is determined  
171 during growth and represents a plant's maximum potential fecundity, and seed set, as described  
172 above. In our experiment, both seed set and total fecundity are potentially determined by the  
173 density and identity of background sown *Clarkia*.

174

175 To remove the effects of pollinator-mediated pollen limitation to seed set, we added conspecific  
176 pollen to one flower on each focal plant (Figure 1B). Comparison of seed set in the pollen  
177 supplemented fruit, whose flower received additional pollen, to seed set in a control fruit, whose  
178 flower did not receive additional pollen quantifies the effect of pollinator-mediated pollen  
179 limitation to seed set (Figure 1C). We refer to these two fruits as “pollen-supplemented” and  
180 “control” fruits in the rest of the paper. Total fecundity calculated from the seed set of control  
181 fruits reflects the combined effects of plant-plant interactions during growth and, via pollinators,  
182 during flowering on plant reproductive success, while total fecundity calculated from the seed  
183 set of pollen-supplemented fruits reflects only the effects of plant-plant interactions during  
184 growth on reproductive success (Figure 1C).



185

186 In late June through early July 2016, we set up 160, 1X1 meter experimental plots in a  
187 community where all four species naturally occur in the Kern River Canyon (35°31'45N,  
188 118°39'36W; Area = 0.57ha). We arranged plots in blocks of four, where plots were separated  
189 by ~1/4 meters, and blocks were separated by ~1/2 meter. We cleared plots of all naturally  
190 occurring *Clarkia* to prevent natural seed rain into the plots but did not disturb the soil. We also  
191 left non-*Clarkia* forbs and grasses in place for two reasons: because it was infeasible to weed  
192 them, and because grasses and forbs make up a substantial component of the vegetation;  
193 removing them could disrupt interactions among *Clarkia*, and our intention was to study  
194 interactions among *Clarkia* species in as natural a setting as possible (Table of common grass  
195 and forb species in Table S1).

196

197 *Clarkia* seeds for the experimental sowing were collected at the study site as well as nearby  
198 sites in the Kern River Canyon at the end of the 2016 growing season (late June). We used a  
199 hand deawner (Hoffman Manufacturing, Inc, Fogelsville PA, USA) to break open the fruits and  
200 extract seed, and a seed blower to separate seed from fruit walls. We sowed the seed into  
201 experimental plots in October 2016 before the onset of winter rains that trigger germination.  
202 Each block was haphazardly assigned a background *Clarkia* species, and each plot within the  
203 block was haphazardly assigned one of five seeding densities (0, 0.04, 0.16, 0.64, and 2.56  
204 g/m<sup>2</sup>). For a given background seeding density, we chose to plant the same mass of seed  
205 because the four species differ in seed size, and seed size correlates with adult plant size. Had  
206 we planted equal seed numbers for a given seeding density, the background biomass, and  
207 hence competitive effect, of large seeded species (*C. unguiculata* and *C. xantiana*) would have  
208 been greater than that of the smaller seeded species (*C. cylindrica* and *C. speciosa*).  
209 Background seeding densities were chosen based on previous estimates of naturally occurring  
210 seed production at the field site (James, unpublished data). For *C. xantiana*, with an average

211 seed mass of 0.025 mg (Gould et al. 2014), the five seeding densities corresponded to 0, 1600,  
212 6400, 25600, and 102400 seeds per m<sup>2</sup>. In total, our design yielded 20 background species X  
213 density treatments, with eight plot replicates per treatment.

214

215 To establish focal plants of each species on which to measure reproductive output, we planted  
216 twenty focal seeds into one of four designated locations (one for each species) in each plot. The  
217 locations were delimited using 2.5cm radius cabone craft rings (CSS Industries, Inc., PA, USA)  
218 secured in the ground with two 3.8cm fence staples. In the spring of 2017, we thinned the focal  
219 seedlings in the cabone rings to one focal *Clarkia* plant. To prevent bias in selecting a focal  
220 seedling, we left the seedling that was closest to the center of the ring and removed the rest. In  
221 this same period, we counted the number of seedlings of background *Clarkia* species that had  
222 germinated and the number of non-target grasses and forbs growing within a 5cm radius from  
223 the focal seedling. We also weeded any seedlings of non-target *Clarkia* species in the  
224 background of all plots.

225

226 During the two-week flowering stage in late May 2017 we haphazardly assigned one flower as  
227 the control to receive no additional pollen, and another flower to receive additional conspecific  
228 pollen on all focal plants with  $\geq 2$  flowers. We selected pairs of flowers that were at a similar  
229 reproductive stage so that they were exposed to similar environments during pollination. To add  
230 conspecific pollen to the pollen addition flowers, we harvested mature, dehiscing anthers from  
231 3-4 flowers from naturally occurring conspecific *Clarkia* growing nearby by 8 am before  
232 pollinators began foraging for the day. The pollen was applied to the freshly opened and  
233 receptive stigmas on the selected flower of a focal plant immediately after harvesting the  
234 anthers. Applying pollen to freshly opened stigmas ensured that they had not received any con-  
235 or heterospecific pollen prior to applying our treatment. Application of pollen in this manner

236 coats the stigma with >300 pollen grains, well in excess of the number of ovules (20-100) in  
237 each ovary (M.A. Geber, pers. obs.).

238

239 We counted the number of fruits on each focal plant and collected the treatment fruits at the end  
240 of the growing season. We also counted the number of filled seeds, aborted seeds, and  
241 unfertilized ovules in each treatment fruit. We harvested all background *Clarkia* in each plot and  
242 weighed the above ground biomass after drying plants at 65 C for 48 hours.

243

244 Pollinator visitation in the interaction plots

245 During the co-flowering period in 2017, we observed bee visitation in the pairwise interaction  
246 plots to quantify pollinator preferences and joint attraction (Figure S1). Due to time limitation and  
247 the fact that some plots did not have surviving focal plants, not all 1m<sup>2</sup> plots were observed;  
248 however, at least one plot from each block was observed during the co-flowering period.

249 Observations were made in ten-minute periods. Bees entering plots were identified to genus or  
250 species and tracked as they made visits to *Clarkia* flowers. After the 10-minute observation  
251 period, we counted and recorded the number and identity of open *Clarkia* flowers in the plot.

252

253 *Pollinator Arrays to assess constancy*

254 We assembled cut-stem arrays of the four *Clarkia* species to observe pollinator behavior during  
255 the 2015 and 2016 *Clarkia* growing seasons. We cleared a 5 x 5m patch of all naturally  
256 occurring *Clarkia* in the middle of the experimental site in late April before *Clarkia* plants had  
257 started flowering. We constructed a grid with nodes at every 0.5m increment for a total of 100  
258 nodes and buried a floral water pick at each node to fill with water and hold *Clarkia* stems.

259

260 Each array contained equal numbers of cut stems of all four *Clarkia* species planted at one of  
261 four densities (in 2015: 10, 20, 40, or 100 stems; in 2016: 12, 24, 64, or 100 *Clarkia* stems)

262 (Table S1). This design allowed us to observe pollinator constancy across a range of plant  
263 densities, holding diversity relatively constant. Because different bee species forage at different  
264 times of day (Hart & Eckhart 2010), we ran most treatments in the morning and afternoon on  
265 different days. For each array run, we gathered *Clarkia* stems before 8am to assemble in the  
266 grid. We arranged *Clarkia* stems in the grid according to a randomly generated map of a  
267 particular treatment, where locations in the grid were either left 'blank' or received one *Clarkia*  
268 stem of a prescribed *Clarkia* species depending on the treatment density.

269

270 During the array runs, we identified and monitored bees as they entered and foraged in arrays.  
271 When a bee entered the array and landed on a flower, one person called out the grid location of  
272 the flower/bee, identified the bee to species or genus, and tracked the bee's movements until it  
273 left the array, while another person recorded. At the end of each array run, we counted the  
274 number of open flowers of each species and then disposed of wilted *Clarkia* stems. Rarely, we  
275 re-used stems if they still had visibly turgid petals and leaves, though we never retained stems  
276 for more than two runs. Array treatments lasted 40 or 60 minutes; many treatments in 2016  
277 were stopped at 40 minutes due to wilting. We did not run the experiment on days when the  
278 predicted peak temperature was below 21°C or wind was stronger than a light breeze.

279

## 280 **Statistical Analysis**

281 All calculations and statistical analyses were performed in R (R version 3.5.2, R Core Team,  
282 2018). We used two different analyses to understand the effects of density dependent  
283 interactions on *Clarkia* seed production. We first investigated density dependent interactions in  
284 the flowering stage by determining how *Clarkia* densities affected seed set (the number of  
285 seeds per ovule in a fruit), and then investigated the density dependent effects of the  
286 neighborhood on *Clarkia* total fecundity using glmms. We then analyzed the three pollinator  
287 foraging behaviors that contribute to density dependence during the flowering stage.

288

289 *Seed set*

290 For each fruit, we defined ‘successes’ as filled seeds, and ‘failures’ as the sum of unfertilized  
291 ovules and aborted seeds. We built a set of candidate models to determine which combination  
292 of four fixed effects factors best explained variation in seed set – the pollination treatment  
293 (pollen supplemented vs. control), the focal *Clarkia* species identity, the background *Clarkia*  
294 species identity, and the biomass of background *Clarkia* in the plot. We did not include non-  
295 *Clarkia* grasses or forbs in this analysis because they flower before *Clarkia* during the  
296 experiment, and therefore would not affect the pollination interactions of *Clarkia*. We also used  
297 one random effect, the identity of the focal plant, in all models. We did not include random  
298 effects for plot nested within block or for block because models with these effects were  
299 unidentifiable. To avoid model dredging, we built a set of models relevant to our questions and  
300 hypotheses with which to perform model selection (Table S3). We fit the data to all candidate  
301 models using the lme4 package (Bates et al. 2015) and selected the model with the lowest AICc  
302 (the best-fit model) for ecological inference. The most complex model included an interaction of  
303 all four fixed effects and represents our prediction that successful seed set depends on the  
304 density dependent effect of the background *Clarkia* on the focal *Clarkia* and varies according to  
305 pollination treatment.

306

307 After identifying the best-fit model, we used estimated marginal means to determine the  
308 predicted density dependent effect of background *Clarkia* on focal *Clarkia* seed set, with and  
309 without pollen addition (package emmeans, Lenth 2019). Here, the effect of pollinators on the  
310 interaction is the change in the density dependent effect of background *Clarkia* on focal *Clarkia*  
311 seed set between the two pollination treatments (pollen addition and no pollen addition). If  
312 pollinators change the strength or direction of the interaction, then the effect of increasing  
313 background *Clarkia* biomass will be significantly different between the two pollination

314 treatments. We also tested if the estimated density dependent effect of background *Clarkia* on  
315 focal *Clarkia* was significantly different from zero for both pollination treatments to examine if  
316 and when pairwise *Clarkia* interactions were significantly different from zero (no effect of  
317 increasing density). Finally, we estimated pollen limitation to successful seed set of each *Clarkia*  
318 species as the difference in the probability of successful seed set between pollen addition vs. no  
319 addition treatments.

320

### 321 *Total fecundity*

322 The second analysis focused on the total fecundity (total seed number) of focal plants in the  
323 interaction plot. We calculated total fecundity as the product of fruit number on a plant, the  
324 average number of ovules, seeds, and aborted seeds across the two sampled fruits (control and  
325 pollen-supplemented), and the proportion of successful seeds in fruits under each pollination  
326 treatment. This allowed us to calculate total estimated reproductive output of the whole plant  
327 under the two treatment scenarios. We used generalized linear mixed effects models with a  
328 Poisson error distribution to model total reproductive output with six potential fixed effects:  
329 pollination treatment, focal *Clarkia* species identity, background *Clarkia* species identity,  
330 background *Clarkia* biomass, and the number of forbs and number of grasses within 5cm of the  
331 focal seedling. Forb and grass counts were centered and standardized to improve model  
332 performance. We included two random effects: an observation-level random effect to account  
333 for over-dispersion in the data, and plant identity. We again did not include random effects for  
334 plot and block because such a model was unidentifiable.

335

336 As before, we built a set of candidate models relevant to the study with which to perform model  
337 selection. The most complex candidate model included an interaction between the pollination  
338 treatment, background *Clarkia* identity, focal *Clarkia* identity, and background *Clarkia* biomass,  
339 as well as the additive effects of forb and grasses (Table S3). This candidate model represented

340 our prediction that whole-plant seed production depends on the density dependent effect of the  
341 background *Clarkia* on the focal *Clarkia*, which is modified by the activity of pollinators. We  
342 again selected the model with the lowest AICc score for ecological inference. With the best-fit  
343 model, we used the Wald test to determine the significance of the predictors on total  
344 reproductive output.

345

#### 346 *Pollinator preference in the pairwise interaction plots*

347 We built an interaction network using the R package bipartite to understand pollinator  
348 preference (Dormann et al. 2008). In the network, we only included the first visit of each  
349 pollinator to a plot because each plot was dominated by a single background species such that  
350 subsequent movements within a plot were likely to be to the same species (visits to focal plants  
351 in plots against a common background species were rare). We first estimated  $d'$ , or network  
352 specialization, of the three most common pollinator taxa (Blüthgen et al. 2006). Higher values of  
353  $d'$  indicate higher values of pollinator specialization within the network, which we interpret as  
354 taxon-level pollinator preferences for different *Clarkia*. We only included the three most common  
355 pollinator taxa because all other pollinators accounted less than 2% of the sample (Table S2).  
356 Next, we used a chi-squared test to compare the proportion of first-choice visits to each *Clarkia*  
357 species with the proportion of each background plot type we observed. If bees have no  
358 preference among *Clarkia*, then the proportion of first-choice visits to each plant species should  
359 be equal to the proportion of plots we observed where that species was sown into the  
360 background.

361

#### 362 *Pollinator constancy in the experimental arrays*

363 To understand the potential for pollinator (in)constancy to affect pairwise interactions between  
364 species, we built a 4x4 matrix for each array run, where rows represent the *Clarkia* species first  
365 visited by a pollinator, and columns represent the species visited next in a sequence of two

366 sequential flower visits. On-diagonal entries in the matrix represent pollinator movements to the  
367 same species of *Clarkia* (constancy), and off-diagonal movements between different species  
368 (inconstancy). We divided the sum of all inconstant movements by the total number of moves in  
369 arrays to quantify the proportion inconstant movements that might lead to incompatible pollen  
370 transfer in *Clarkia*. We also tabulated the number of inconstant movements between each pair  
371 of *Clarkia* species and conducted a chi-squared test to determine which pairs of species are at  
372 higher risk for incompatible pollen transfer.

373

#### 374 *Joint attraction in the pairwise interaction plots*

375 We used a generalized linear mixed effects model of visitation rate (visits per 10-minute  
376 observation interval) with a Poisson error distribution to determine the potential for joint  
377 attraction in the pairwise interaction plots. Log-transformed floral abundance was used as a  
378 fixed effect in the model, and we included random effects for plot and observation period. Joint  
379 attraction in this analysis would be an increase in visitation rate as a function of floral  
380 abundance.

381

## 382 **Results**

### 383 ***The effect of interactions during growth and flowering on seed production***

384 We collected 371 fruits from 232 focal *Clarkia* plants in the pairwise interaction plots. The  
385 uneven number of fruits collected was due to fruit loss from herbivory. We found that the best-fit  
386 model of the probability of successful seed set included the four-way interaction between focal  
387 *Clarkia* species identity, background *Clarkia* species identity, background *Clarkia* biomass, and  
388 pollination treatment (Table S3). In other words, the best fit model of the probability of seed set  
389 depended on the species-specific, density dependent effect of background *Clarkia* on focal  
390 *Clarkia*, and this effect was modified by pollination treatments.

391



392 Pollination significantly changed the density dependent effect of background *Clarkia* on focal  
393 *Clarkia* seed set in 31% of the interactions (five of 16 interactions: Figure 2, Table 1). In three of  
394 these interactions, the density dependent effect was more competitive when the effect of  
395 pollinators was included (no pollen addition treatment) than when the effect of pollinators was  
396 removed (pollen addition treatment). In other words, pollinator-mediated interactions introduced  
397 a competitive effect of the background *Clarkia* on focal *Clarkia* for the following three  
398 background/focal species combinations: *C. unguiculata*/*C. xantiana*; *C. xantiana*/*C. unguiculata*;  
399 and *C. cylindrica*/*C. xantiana*. Conversely, in the other two cases, the density dependent effect  
400 of the background was more positive with the effect of pollinators than without; that is, pollinator-  
401 mediated interactions introduced a facilitative effect of the background on focal *Clarkia* in *C.*  
402 *speciosa*/*C. cylindrica* and *C. speciosa*/*C. speciosa* background/focal combinations. Of these  
403 interactions, only two of the 32 density dependent effects of background *Clarkia* density on  
404 *Clarkia* seed set were significantly different from zero. One was the competitive effect of *C.*  
405 *unguiculata* on *C. xantiana* in the pollen addition treatment ( $z = -2.49$ ,  $p = 0.01$ ), and the other was  
406 the competitive effect of *C. cylindrica* on *C. xantiana* in the no pollen addition treatment ( $z = -$   
407  $4.89$ ,  $p < 0.001$ ) (Figure 2).

408  
409 Finally, the average pollen limitation to successful seed set varied by focal species. Additional  
410 pollen increased seed set in three of the four species: *C. unguiculata*, *C. cylindrica*, and *C.*  
411 *xantiana*. The treatment effect was highest for *C. unguiculata*, indicating that pollination service  
412 limited its successful seed set the most of the four species (Figure 3, Table S4). The treatment  
413 effect was lowest in *C. speciosa*, which experienced slightly lower seed success under pollen  
414 supplementation (Figure 3, Table S4).

415  
416 The best-fit model for total fecundity included the additive fixed effects of (1) pollination  
417 treatment and (2) the number of forbs surrounding the focal plant when it was a seedling (Table

418 S2). In other words, total fecundity of focal *Clarkia* plants was best predicted by the effect that  
419 non-*Clarkia* forbs had on focal plants during growth, and wholesale pollen limitation in *Clarkia*  
420 during flowering (Figure 4). Total fecundity strongly declined with increasing forbs ( $-0.77 \pm 0.15$   
421 SE; Wald p-value < 0.001, Table S5) and was significantly higher in the pollen addition  
422 treatment relative to the no pollen addition treatment ( $1.17 \pm 0.20$  SE; Wald p-value < 0.001,  
423 Table S5).

424

### 425 ***Pollinator foraging behaviors***

#### 426 *Preference and joint attraction in the interaction plots*

427 We performed 193, 10-minute observation periods and observed 446 pollinators in the *Clarkia*  
428 interaction plots in 2017. The three most abundant pollinator visitors, in order of abundance,  
429 were *Diadasia angusticeps* (Apidae), *Hesperapis regularis* (Mellitidae), and *Lasioglossum spp.*  
430 (Halictidae) bees, which made up more than 99% of all observed pollinators (Table S2). The  
431 preference of these three pollinators varied: *D. angusticeps* exhibited the most specialized  
432 behavior, visiting *Clarkia speciosa* to the near exclusion of the other *Clarkia* ( $d' = 0.79$ ), followed  
433 by *H. regularis* ( $d'=0.33$ ), and *Lasioglossum sp.* ( $d'=17$ ), both of which visited all four *Clarkia*, but  
434 most commonly *C. xantiana* and *C. cylindrica* (Figure 5, Panel A).

435

436 Overall visitation to the different *Clarkia* was significantly different from the null expectation that  
437 visitation to each species is proportional to the frequency with which we observed plots with  
438 each background-sown *Clarkia* ( $\chi^2(3)=104.47$ ;  $p<0.001$ ). The residuals of the chi-squared  
439 analysis indicate pollinator preference for *C. speciosa* and *C. xantiana* (Pearson residuals = 7.6  
440 and 2.4, respectively), and avoidance of *C. cylindrica* and *C. unguiculata* (Pearson residuals = -  
441 3.7, -5.2, respectively).

442

#### 443 *Pollinator constancy in the experimental arrays*

444 We performed 17 array runs with all four *Clarkia* species, observing 664 pollinator movements  
445 from 418 bees across 2015 and 2016. Only 100 of the 664 movements (15%) were between  
446 different plant species (and thus inconstant); therefore, *Clarkia* pollinators are by and large  
447 constant foragers, even when equally exposed to all four *Clarkia* species. Interspecific  
448 movements were significantly different from the null expectation of being evenly divided among  
449 species pairs ( $\chi^2(5)=65.56$ ;  $p<0.001$ ). The species pairs where switching occurred most  
450 frequently were *C. xantiana* and *C. unguiculata* and *C. xantiana* and *C. cylindrica*. These were  
451 the only species pairs with Pearson residuals  $> 1$  (Pearson residuals=6.45 and 1.55  
452 respectively). Movements between individuals in these pairs of accounted for more than 60% of  
453 inconstant movements in the dataset (Figure 5, Panel B).

454

#### 455 *Pollinator Joint Attraction*

456 Pollinator visitation rate (in visits per 10-minute observation periods) increased with log floral  
457 abundance in the interaction plots, indicating joint attraction ( $0.86\pm 0.11$ ,  $p<0.001$ ; Figure 5,  
458 Panel C).

459

#### 460 **Discussion**

461 In community ecology, density dependent species interactions are the building blocks of  
462 theories of community function and species persistence. In focusing on either the combined  
463 effects of interaction types on species interactions or a single interaction type, studies often  
464 overlook the multiplex nature of species interactions which can result in overly simplistic  
465 predictions about plant community dynamics (Losapio et al. 2019, Bartomeus et al. 2021). In  
466 this study we do our best to reconcile that plant interactions during both growth and flowering  
467 can affect density dependent interactions between co-flowering plant species in a group of four  
468 sympatric pollinator-sharing *Clarkia* species.

469

470 ***The importance of studying multiple life history stages to understand plant interactions***

471 We found that the contribution of pollinator-mediated interactions during flowering to total plant  
472 fecundity is, above all, contingent on what transpires during growth. Whereas successful seed  
473 set depended on pollinator-mediated *Clarkia* interactions (discussed below), the only density  
474 dependent interaction explaining the total fecundity of focal plants was that of the non-*Clarkia*  
475 forbs surrounding seedlings during growth. We anticipated that the effect of interactions during  
476 flowering might change the direction and/or magnitude of density dependence independently of  
477 the effects of growing together, which is how previous studies have typically framed the  
478 question of how pollinators could affect plant coexistence dynamics (e.g. Benadi & Pauw 2018,  
479 Bergamo et al. 2020, Lanuza et al. 2018, Lázaro et al. 2014, Rathcke 1983). In contrast, our  
480 findings were surprising in two ways: first, the competitive effect exerted by plants during growth  
481 limited total fecundity so strongly, by limiting total ovule production, that it masked the effect of  
482 pollinator-mediated interactions on seed production per ovule during flowering. This  
483 demonstrates that the significance of pollinator-mediated plant interactions for plant fecundity is  
484 constrained by, rather than independent of, plant interactions during growth.

485  
486 Second, density dependent competition during growth was exerted by non-*Clarkia* forbs on  
487 *Clarkia* seedlings, whereas the density dependent effects of pollinator-mediated interactions  
488 during flowering were exerted by *Clarkia* on *Clarkia*. This result demonstrates that the density  
489 dependent effects of particular species (in this case, congeneric *Clarkia*) are potentially only  
490 relevant during one, rather than all, life stages (Leslie 2005). Stage-dependent interactions  
491 have been explored in animal communities in terms of ontogenetic niche shifts (Werner &  
492 Gillam 1984, Bassar et al. 2017), and our results suggest that accounting for ontogeny may be  
493 appropriate for understanding plant community coexistence as well. This result also highlighted  
494 that studying *Clarkia* interactions without removing background grasses and forbs was revealing  
495 of the ecology of the plant community. Had we taken a more traditional approach of studying

496 pairwise interactions without the rest of the annual plant community (by weeding, for example),  
497 we may have concluded that interactions during flowering are strong drivers of *Clarkia*  
498 interaction dynamics, because it would have been impossible to detect the density dependent  
499 effects introduced by non-*Clarkia* forbs. Our results support the idea that studying species  
500 interactions in a pairwise fashion can limit our understanding of community structure and  
501 function (Abrams 1983, Chesson 2018, Levine et al. 2017, Mayfield & Stouffer 2017). One way  
502 to incorporate such complexity into predictive models may be to leverage the growing body of  
503 network theory (Godoy et al. 2018, Opedal & Heglend 2020, Valdovinos 2019, Losapio et al.  
504 2019) to build models that capture how the stage-specificity and contingency of density  
505 dependent species interactions affect population persistence and community structure.  
506 Alternatively, the implications of our findings could be explored by using population models to  
507 compare plant species persistence in communities where interactions during growth take  
508 precedence in determining fecundity, versus communities where pollinator-mediated  
509 interactions determine fecundity.

510

511 ***Pollinator-mediated interactions correspond to foraging behavior and affect seed set***

512 We have shown that pollinator-mediated interactions during flowering affect seed set at the  
513 scale of the fruit and can be linked to the foraging behaviors of pollinators. This links two types  
514 of pollination ecology: studies that show that pollinator foraging varies according to community  
515 context (Eckhart et al. 2006, Lázaro et al. 2009, Valdovinos et al. 2013), and that pollinator  
516 sharing among species affects focal plant performance (Bergamo et al. 2019, Moeller 2004,  
517 Lanuza et al. 2018). Here we found that pollinators changed the positive, negative, or neutral  
518 effect of background *Clarkia* density on seed set in five of 16 species interactions. A few  
519 patterns stand out from this analysis. First, the *Clarkia* pairs that exhibited density dependent  
520 interactions significantly different than zero (*C. cylindrica* background/*C. xantiana* focal, and *C.*  
521 *unguiculata* background/*C. xantiana* focal) shared pollinators and represented the two species

522 pairs where pollinators were most likely to make interspecific (inconstant) visits (Figure 5, Panel  
523 B). In one of these interactions, the significantly competitive effect of *C. unguiculata* density on  
524 *C. xantiana* was neutralized when including the effect of pollinator sharing. To wit, pollinators  
525 acted as a facilitative force and ‘rescued’ *C. xantiana* from the otherwise competitive effect of  
526 increasing *C. unguiculata* density. This result may be explained by joint attraction, where  
527 increasing *Clarkia* density in the plot attracted more pollinators overall, and that pollinators  
528 preferred *C. xantiana* much more than they did *C. unguiculata*, resulting in *C. xantiana* receiving  
529 a disproportionate amount of pollinator visits. In the other species interaction significantly  
530 different from zero, pollinators introduced a competitive effect of *C. cylindrica* on *C. xantiana*.  
531 We suspect this can be explained simply by incompatible pollen transfer between plants from  
532 inconstant shared pollinators. Alternatively, the fact that pollinators alleviated competition in one  
533 case but exacerbated competition in another could be explained by potential differences in how  
534 different species tolerate incompatible pollen. For example, previous work has shown that  
535 flowering plants, including *Clarkia*, exhibit species-specific sensitivity or tolerance to  
536 heterospecific pollens (Arceo-Gómez et al. 2016, Arceo-Gómez et al. 2019); it is possible that  
537 *C. xantiana* tolerates *C. unguiculata* pollen better than it does *C. cylindrica* pollen, resulting in  
538 the differences in pollinator-mediated interactions.

539

540 In addition, the only species that exhibited a significant intraspecific pollinator-mediated  
541 interaction was *C. speciosa*, which does not share pollinators to a great extent with the other  
542 three species and experienced lower rates of inconstant visitation. In this instance, increasing  
543 conspecific density trended toward competition when the effect of pollinators was removed but  
544 trended toward facilitation when the effect of pollinators was retained. This suggests that joint  
545 attraction can introduce a positive density dependent Allee effect in conspecific stands of  
546 flowering plants, as suggested by a previous model exploring the relationship between pollinator  
547 foraging, plant density, and plant performance (Kunin & Iwasa 1996). However, we would likely

548 not have found positive density dependence if not for *Diadasia angusticeps*, which has a  
549 decided preference for *C. speciosa*, and was quite abundant in 2017. Without *D. angusticeps*,  
550 or in years of low abundance, pollination service to *C. speciosa* would likely have been lower in  
551 both quantity and quality both because generalists can exacerbate negative reproductive  
552 outcomes (Kunin 1993) and because competition for pollinator services generally increases in  
553 plant communities when pollinators are scarcer (Lázaro et al. 2014, Ye et al. 2014).

554

555 Finally, the effect of *C. speciosa* backgrounds on *C. cylindrica* seed set trended towards  
556 facilitative without the effect of pollinators but became less so with effect of pollinators; in this  
557 case, pollinators introduced a competitive effect that dampened *C. speciosa* facilitation of *C.*  
558 *cylindrica*. Because these two species do not share pollinators (Figure 4 Panel A), and there is  
559 rarely switching between the two (Figure 4 Panel C), the competitive effect from pollinators is  
560 likely due to low pollinator service to *C. cylindrica* when surrounded by *C. speciosa* (Table 1).

561

### 562 ***Plant-pollinator networks are predictive of plant average pollen limitation***

563 In our study, network information corresponded to patterns in plant species' average pollen  
564 limitation. Whereas additional compatible pollen did not increase seed set in focal *C. speciosa*, it  
565 did increase the average seed set in the three other species: *C. xantiana* experienced a small  
566 boost in seed set with additional pollen, *C. cylindrica* a slightly higher boost, and *C. unguiculata*  
567 saw the greatest effect of additional pollen on seed set. Thus, high pollinator preference and low  
568 rates of pollinator sharing translated to high rates of compatible pollen transfer for *C. speciosa*.  
569 In contrast, higher rates of pollinator sharing likely resulted in interspecific pollen transfer in the  
570 three other *Clarkia* species resulting in pollen limitation, and the magnitude of pollen limitation  
571 corresponded to pollinator preference. The promising implication of this result is that  
572 comparatively easy-to-collect information from plant-pollinator interaction networks maps closely  
573 to average pollen limitation in plant populations, which is more difficult to measure. Testing this

574 idea in high diversity plant-pollinator systems would help illuminate the potential relationship  
575 between plant population level pollen limitation and plant-pollinator networks.

576

### 577 ***Conclusion***

578 In this work, we have endeavored to understand how density dependence during growth and  
579 flowering, separately and in combination, determine plant seed production. We found that the  
580 effects of species interactions in the flowering phase of life were explained by pollinator foraging  
581 behaviors, but that these effects on total fecundity were overridden by interactions in the growth  
582 phase. In total, this study shows how natural history work describing the complexity of biological  
583 interactions can be linked to performance variables relevant to population and community  
584 dynamics in ways that are revealing of community function. It may also help frame future  
585 theoretical studies of stage-dependent multispecies interactions, as the larger task of identifying  
586 the population and community-level ramifications of such interactions remains.

587



588 **Literature Cited**

- 589 Abrams, P.A. 1983. Arguments in Favor of Higher Order Interactions. *The American Naturalist*  
590 121: 887-891.
- 591 Angert, A., Huxman, T., Chesson, P., Venable, D. 2009. Functional Tradeoffs Determine  
592 Species Coexistence via the Storage Effect. *Proceedings of the National Academy of Sciences*  
593 106: 11641-11645.
- 594 Arceo-Gómez, G., Raguso, R.A., and Geber, M.A. 2016. Can Plants Evolve Tolerance  
595 Mechanisms to Heterospecific Pollen Effects? An Experimental Test of the Adaptive Potential in  
596 *Clarkia* Species. *Oikos* 125: 718–25.
- 597 Arceo-Gómez, G., Schroeder, A., Albor, C., Ashman, T.L., Knight, T.M., Bennett, J.M., Suarez,  
598 B., and Parra-Tabla, V. 2019. Global Geographic Patterns of Heterospecific Pollen Receipt Help  
599 Uncover Potential Ecological and Evolutionary Impacts across Plant Communities Worldwide.  
600 *Scientific Reports* 9:8086.
- 601 Barrios, B., Pena, S.R., Salas, A., and Koptur, S. 2016. Butterflies Visit More Frequently, but  
602 Bees Are Better Pollinators: The Importance of Mouthpart Dimensions in Effective Pollen  
603 Removal and Deposition. *AoB PLANTS* 8:plw001.
- 604 Bartomeus, I., Saavedra, S., Rohr, R.P., Godoy, O. 2021. Experimental Evidence of the  
605 Importance of Multitrophic Structure for Species Persistence. *Proceedings of the National*  
606 *Academy of Sciences*, 118: e2023872118.
- 607 Bassar, D.B., Travis, J., and Coulson, T. 2017. Predicting Coexistence in Species with  
608 Continuous Ontogenetic Niche Shifts and Competitive Asymmetry. *Ecology* 98: 2823-2836.

- 609 Bates, D., Maechler, M., Bolker, B., Walker, S. 2015. Fitting Linear Mixed-Effects Models Using  
610 lme4. *Journal of Statistical Software*, 671: 1-48.  
611
- 612 Benadi, G. 2015. Requirements For Plant Coexistence Through Pollination Niche Partitioning.  
613 *Proceedings of the Royal Society B* 282:20150117.
- 614 Benadi, G., and Pauw, A. 2018. Frequency Dependence of Pollinator Visitation Rates Suggests  
615 That Pollination Niches Can Allow Plant Species Coexistence. *Journal of Ecology* 106: 1892–  
616 1901.
- 617 Bergamo, P.J., Streher, N.S., Traveset, A., Wolowski, M., and Sazima, M. 2020. Pollination  
618 Outcomes Reveal Negative Density Dependence Coupled with Interspecific Facilitation among  
619 Plants. *Ecology Letters* 23:129-139.
- 620 Bimler, M. D., Stouffer, D., Lai, H. R., and Mayfield, M.M. 2018. Accurate Predictions of  
621 Coexistence in Natural Systems Require the Inclusion of Facilitative Interactions and  
622 Environmental Dependency. *Journal of Ecology* 106: 1839–1852.
- 623 Bizecki Robson, D. 2013. An Assessment of the Potential for Pollination Facilitation of a Rare  
624 Plant by Common Plants: *Symphyotrichum sericeum* (Asteraceae) as a Case Study. *Botany* 91:  
625 34–42.
- 626 Blüthgen, N., Menzel, F., and Blüthgen, N. 2006. Measuring Specialization in Species  
627 Interaction Networks. *BMC Ecology* 6:9.
- 628 Chesson, P. 2018. Updates on Mechanisms of Maintenance of Species Diversity. *Journal of*  
629 *Ecology* 106: 1773–1794.

- 630 Dormann, C.F., Fründ, J., Blüthgen, N. & Gruber B. 2009. Indices, graphs and null models:  
631 analyzing bipartite ecological networks. *The Open Ecology Journal* 2: 7-24.
- 632 Dybzinski R., and Tilman, D. 2007. Resource Use Patterns Predict Long-Term Outcomes of  
633 Plant Competition for Nutrients and Light. *The American Naturalist* 170; 305-318.
- 634 Eckhart, V., Rushing, N.S., Hart G.M., and Hansen, J.D. 2006. Frequency-Dependent Pollinator  
635 Foraging in Polymorphic *Clarkia xantiana* ssp. *xantiana* Populations: Implications for Flower  
636 Colour Evolution and Pollinator Interactions. *Oikos* 112: 412–21.
- 637 Eisen, K.E., and Geber, M.A. 2018. Ecological Sorting and Character Displacement Contribute  
638 to the Structure of Communities of *Clarkia* Species. *Journal of Evolutionary Biology* 31: 1440–  
639 58.
- 640 Eisen, K.E., Wruck, A.C. and Geber, M. A. 2020. Floral Density and Co-occurring Congeners  
641 Alter Patterns of Selection in Annual Plant Communities. *Evolution* 74:1682-1698.
- 642 Feldman, T.S., Morris, W.F. and Wilson, W.G. 2004. When Can Two Plant Species Facilitate  
643 Each Other 's Pollination? *Oikos* 105:197–207.
- 644 Godoy, O., and Levine, J.M. 2014. Phenology Effects on Invasion Success: Insights from  
645 Coupling Field Experiments to Coexistence Theory. *Ecology* 95: 726–36.
- 646 Godoy, O., Kraft, N. J. B., and Levine, J. M. 2014. Phylogenetic Relatedness and the  
647 Determinants of Competitive Outcomes. *Ecology Letters* 17:836–844.
- 648 Godoy, O., Bartomeus, I., Rohr, R.P., and Saavedra, S. 2018. Towards the Integration of Niche  
649 and Network Theories. *Trends in Ecology and Evolution* 33:287–300.

- 650 Gould, B., Moeller, D.A., Eckhart, V.M., Tiffin, P., Fabio, E., and Geber, M. A. 2014. Local  
651 Adaptation and Range Boundary Formation in Response to Complex Environmental Gradients  
652 Across the Geographic Range of *Clarkia xantiana* ssp. *xantiana*. *Journal of Ecology* 102:95-107.
- 653 Hart, G.M., and Eckhart, V.M. 2010. Ecological Separation in Foraging Schedule and Food  
654 Type Between Pollinators of The California Wildflower, *Clarkia xantiana* ssp. *xantiana*. *Journal*  
655 *of Pollination Ecology* 2:13-20.
- 656 Hove, A. A., Mazer, S.J., Ivey, C.T. 2016. Seed Set Variation in Wild *Clarkia* Populations:  
657 Teasing Apart the Effects of Seasonal Resource Depletion, Pollen Quality, and Pollen Quality.  
658 *Ecology and Evolution* 6: 6524-6536.
- 659 Kraft, N., Godoy, O., and Levine, J. 2014. Plant Functional Traits and the Multidimensional  
660 Nature of Species Coexistence. *Proceedings of the National Academy of Sciences* 112: 797-  
661 802.
- 662 Kunin, W. 1993. Sex and the Single Mustard: Population Density and Pollinator Behavior Effects  
663 on Seed Set. *Ecology* 74: 2145-2160.
- 664 Kunin, W., and Iwasa, Y. 1996. Pollinator Foraging Strategies in Mixed Floral Arrays: Density  
665 Effects and Floral Constancy. *Theoretical Population Biology* 49: 232–63.
- 666 Lanuza, J. B., Bartomeus, I. and Godoy, O. 2018. Opposing Effects of Floral Visitors and Soil  
667 Conditions on the Determinants of Competitive Outcomes Maintain Species Diversity in  
668 Heterogeneous Landscapes. *Ecology Letters* 21: 865–74.
- 669 Lázaro, A., Lundgren, R., Totland, Ø., La'zaro, A., Lundgren, R., & Totland, Ø. (n.d.). Co-  
670 flowering neighbors influence the diversity and identity of pollinator groups visiting plant species.  
671 *Oikos* 118: 691-702.

672

673 Lázaro, A., Lundgren, R., and Totland, Ø. 2014. Experimental Reduction of Pollinator Visitation  
674 Modifies Plant–Plant Interactions for Pollination. *Oikos* 123: 1037–48.

675 Lenth, R. 2020. emmeans: Estimated Marginal Means, aka Least-Squares Means. R package  
676 version 1.4.4. <https://CRAN.R-project.org/package=emmeans>

677 Leslie, H. 2005. Positive Intraspecific Effects Trump Negative Effects in High-Density Barnacle  
678 Aggregations. *Ecology* 86: 2716-2725.

679 Levine, J.M., Bascompte, J., Adler, P.B., and Allesina, S. 2017. Beyond Pairwise Mechanisms  
680 of Species Coexistence in Complex Communities. *Nature* 546: 56-64.

681 Lewis, H. and Lewis, M. E. 1955. The Genus *Clarkia*. University of California Publications in  
682 Botany 20: 241–392.

683 Losapio, G., Fortuna, M.A., Bascompte, J. Schmid, B., Michalet, R., Neumeyer, R., Castro, L.,  
684 Cerretti, P., Germann, C., Haenni, J.P., Klopstein, S., Ortize-Sanchez, F.J., Pont, A.C., Rouse,  
685 P., Schmid, K. Sommaggio, D., and Schöb, C. 2019. Plant Interactions Shape Pollination  
686 Networks via Nonadditive Effect. *Ecology* 100:e02619.

687 MacSwain, J. W., Raven, P. H. and Thorp, R. W. 1973. Comparative Behaviour of Bees and  
688 Onagraceae. IV. *Clarkia* bees of the western United States. University of Calif. Publ. Entomol.  
689 1:80.

690 Mayfield, M.M., and Stouffer, D.B. 2017. Higher-order Interactions Capture Unexplained  
691 Complexity in Diverse Communities. *Nature Ecology and Evolution* 1:62.

- 692 Moeller, D.A. 2004. Facilitative Interactions among Plants via Shared Pollinators. *Ecology* 85:  
693 3289–3301.
- 694 Moeller, D.A. 2005. Pollinator Community Structure and Sources of Spatial Variation In Plant-  
695 Pollinator Interactions In *Clarkia xantiana* ssp. *xantiana*. *Oecologia* 142: 28-37.
- 696 Moeller, D.A., Geber, M.A., Eckhart V., and Tiffin, P. 2012. Reduced Pollinator Service and  
697 Elevated Pollen Limitation at the Geographic Range Limit of an Annual Plant. *Ecology* 93: 1036-  
698 1048.
- 699 Morales, C.L., and Traveset, A. 2008. Interspecific Pollen Transfer: Magnitude, Prevalence and  
700 Consequences for Plant Fitness. *Critical Reviews in Plant Sciences*, 27:221-238.
- 701 Moreira-Hernández, J.I., and Muchhala, N. 2019. Importance of Pollinator Mediated Interspecific  
702 Pollen Transfer for Angiosperm Evolution. *Annual Review of Ecology, Evolution, and*  
703 *Systematics* 50:191-217.
- 704 Opedal, Ø.H., and Hegland, S.J. 2020. Using Hierarchical Joint Models to Study Reproductive  
705 Interactions in Plant Communities. *Journal of Ecology* 108:485-495.
- 706 Pauw, A. 2012. Can Pollination Niches Facilitate Plant Coexistence? *Trends in Ecology &*  
707 *Evolution* 28:30-37.
- 708
- 709 Phillips R.D., Peakall R., van der Niet T., and Johnson S.D. 2020. Niche Perspectives on Plant-  
710 Pollinator Interactions. *Trends in Plant Science* 25:779-793.
- 711
- 712 Rathcke, B. 1983. Competition and Facilitation Among Plants for Pollination. In Leslie Real  
713 Editor, *Pollination Biology*, 305-329.

- 714 Singh, I. 2014. Pollination interaction networks between *Clarkia* (Onagraceae) species and their  
715 pollinators in the Southern Sierra Nevada, California. Cornell University.
- 716 Song, Z. and Feldman, M.W. 2014. Adaptive Foraging Behaviour of Individual Pollinators and  
717 the Coexistence of Co-flowering Plants. *Proceedings of the Royal Society B* 281: 20132437.
- 718 Valdovinos F.S., Moisset de Espanés P., Flores J.D., and Ramos-Jiliberto R. 2013. Adaptive  
719 Foraging Allows the Maintenance of Biodiversity of Pollination Networks. *Oikos* 122: 907–917.
- 720 Valdovinos, F. S. 2019. Mutualistic Networks: Moving Closer to a Predictive Theory. *Ecology*  
721 *Letters*, 22L 1517–1534.
- 722 Wainwright, C., HilleRisLambers, J., Lai, H. Loy, X. and Mayfield. M.M. 2019. Distinct  
723 Responses of Niche and Fitness Differences to Water Availability Underlie Variable Coexistence  
724 Outcomes in Semi-arid Annual Plant Communities. *Journal of Ecology* 107: 293-306.
- 725 Waser, N.M., Chittka, L., Price, M.V., Williams, N.M., and Ollerton, J. 1996. Generalization in  
726 Pollination Systems, and Why It Matters. *Ecology* 77:1043–60.
- 727 Werner, E.E. and Gillam, J.F. 1984. The Ontogenetic Niche and Species Interactions in Size-  
728 Structured Populations. *Annual Review of Ecology and Systematics* 15: 393-425.
- 729 Ye, Z.M., Dai, W.K., Jin, X.F., Gituru, R.W., Wang, Q.F., and Yang, C.F. 2014. Competition and  
730 Facilitation among Plants for Pollination: Can Pollinator Abundance Shift the Plant-Plant  
731 Interactions? *Plant Ecology* 215:3–13.

732

### A *Clarkia* background sowing rate

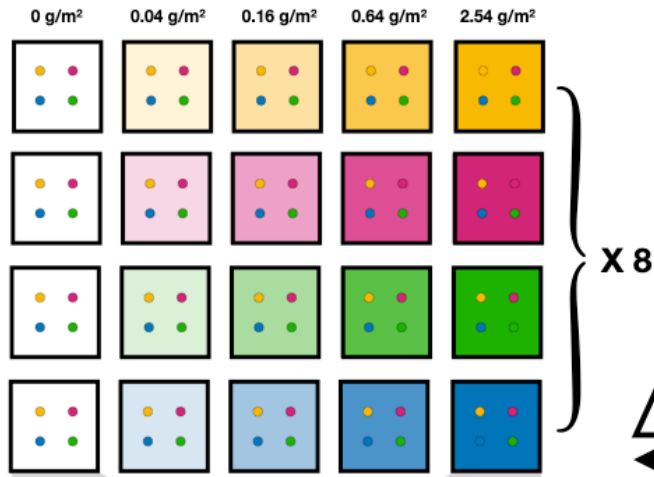

### B Plot design

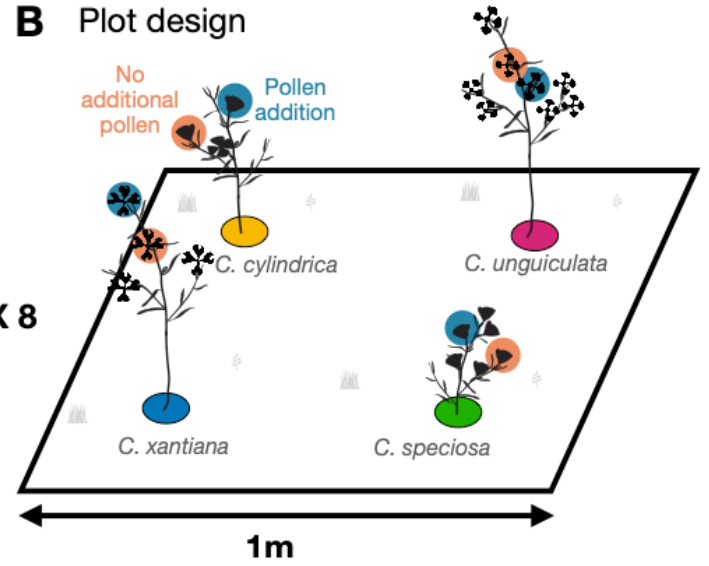

### C Response Variables

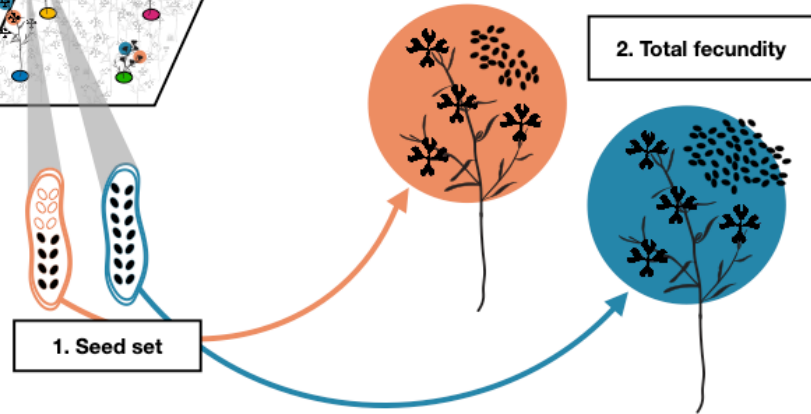

733

734



735 Figure 1. Schematic of the pairwise interaction plot experiment. A. In experimental 1m x 1m  
736 plots, seeds of one *Clarkia* species (yellow: *C. cylindrica*, green: *C. speciosa*, pink: *C.*  
737 *unguiculata*, blue: *C. xantiana*) were sown in the background at a range of seeding rates from  
738 0g/m<sup>2</sup> to 2.54g/m<sup>2</sup>; 20 seeds of a focal *Clarkia* species were sown in one of the four cabone  
739 rings secured in the four corners of the plot. Following germination, focal seedlings in the  
740 cabone rings were thinned to a single individual. The schematic shows the range of  
741 background treatments but does not depict the actual arrangement of plots in the field. Four  
742 plots with a given background species and varying background seeding densities were grouped  
743 into blocks. There were 8 replicate plots of each background species x background seeding  
744 density. B. Depiction of pollination treatments on focal plants. In each plot, two pollination  
745 treatments were applied to all focal plants that had 2 or more flowers. One flower was assigned  
746 as the control and received no additional pollen while the second flower received additional  
747 pollen from hand pollination. Pollen was collected from the appropriate *Clarkia* species from  
748 plants growing at the site but outside of experimental plots. C. Two response variables were  
749 measured on each focal plants 1) seed set equal to the ratio of filled seed to total ovules  
750 (unfertilized ovules, aborted ovules and filled seed) in fruits from control and pollen-addition  
751 flowers; 2) total fecundity equal to the product of fruit number, average total ovule number per  
752 fruit, and average seeds per fruit in the two different pollination treatments.

753

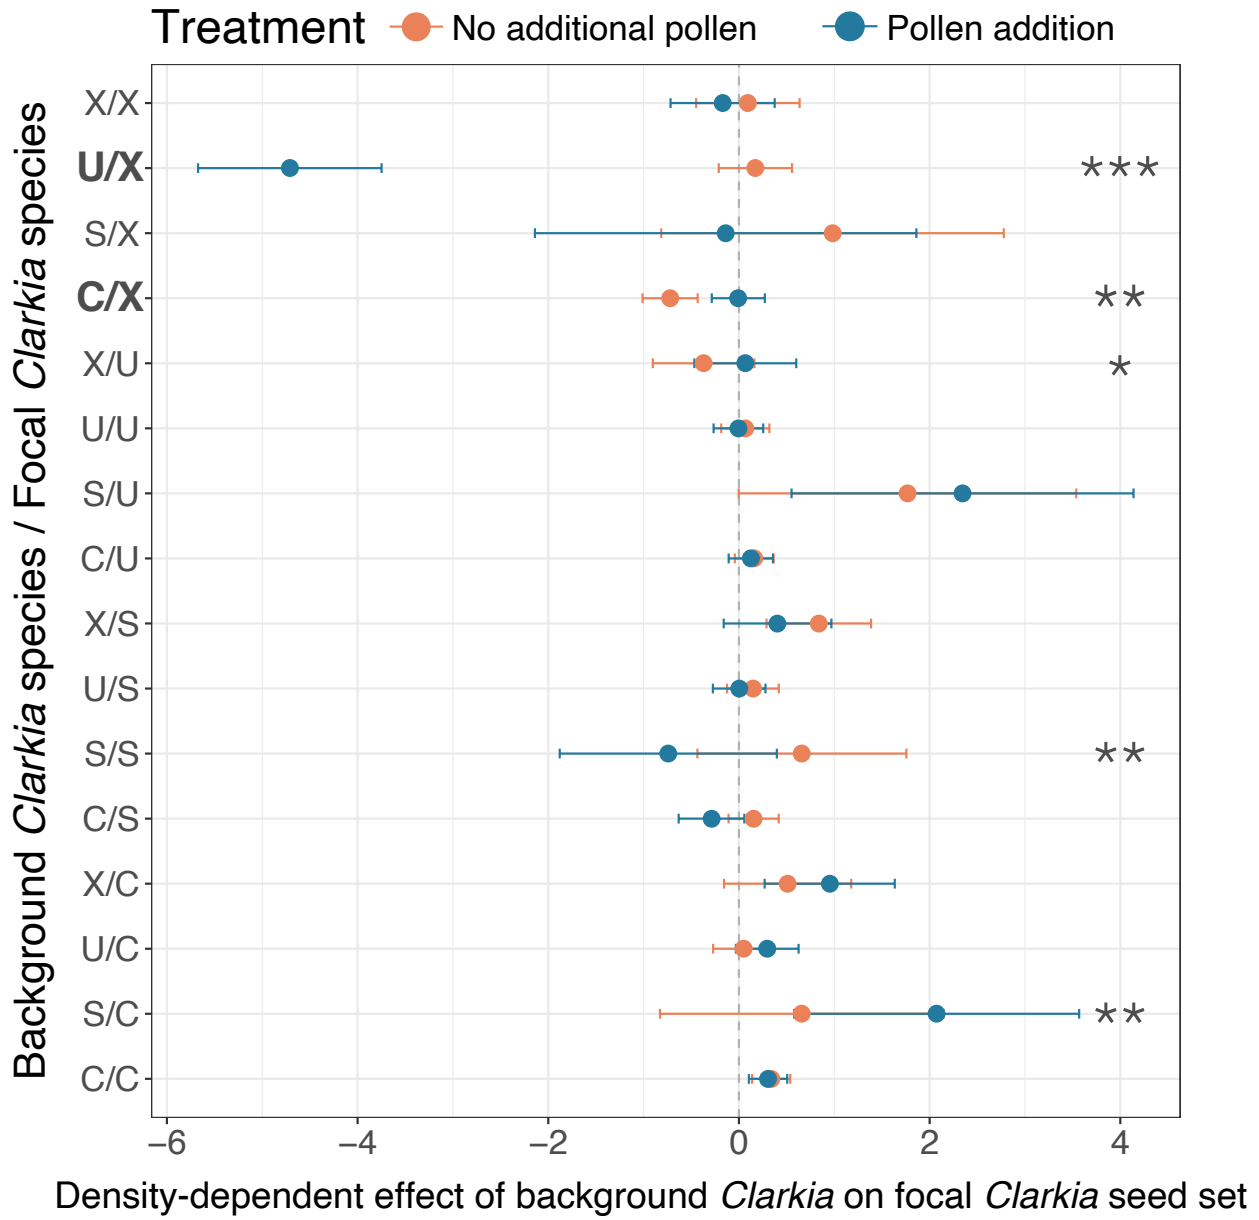

754

755

756 Figure 2. The effect of increasing density of background *Clarkia* on the probability of an ovule  
757 becoming a successful seed in focal *Clarkia*. The effect (slope) varies according to species pairs  
758 and interactions over pollination. Each row is a different background/focal species combination.  
759 Points indicate the estimated effect of increasing background species' density on the probability  
760 of seed set for the focal species, and lines are standard errors. Negative values indicate the  
761 probability of seed set declines with increasing background density (a competitive effect of  
762 background *Clarkia*), whereas positive values mean that the probability of seed set increases  
763 with background density (there is a facilitative effect of background *Clarkia*). Letters stand for  
764 the first letter of the species name: C- *Clarkia cylindrica*; S- *C. speciosa*; U-C. *unguiculata*; and  
765 X- *C. xantiana*. Blue points are the treatment where the effect of pollinators is removed (pollen  
766 addition). Orange points are the treatment where the effect of pollinators is retained (no  
767 additional pollen). Bolded combinations are those that include an interaction between  
768 background density and pollination treatment that is significantly different from zero; stars  
769 indicate a significant effect of pollination treatment on the interaction (\*,  $p < 0.05$ ; \*\*,  $p < 0.01$ ; \*\*\*,  
770  $p < 0.001$ ).

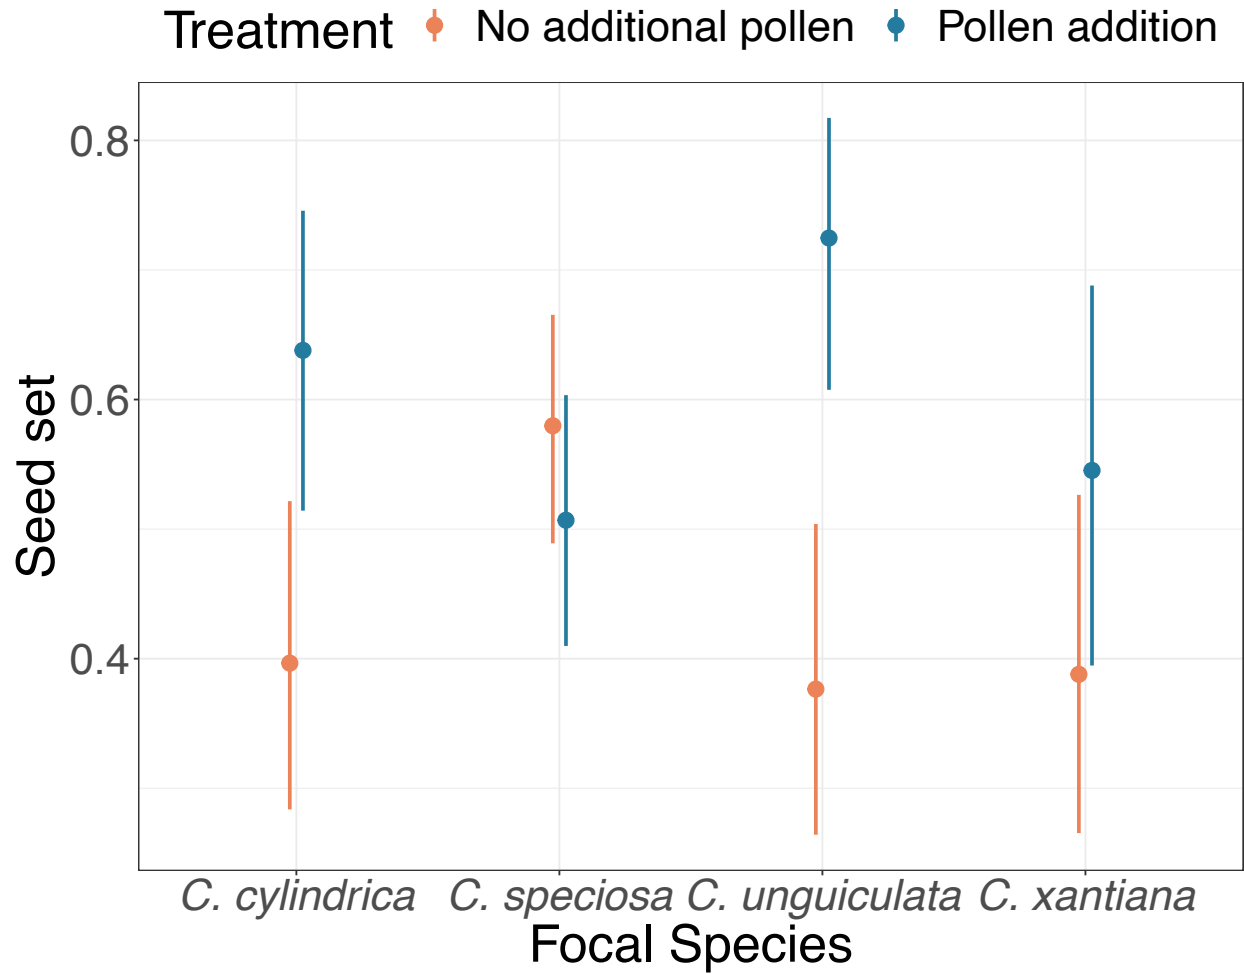

771

772 Figure 3. Species-specific probability of seed success in fruits for both pollination treatments.

773 Points represent the marginal estimated average across all background species treatments at

774 the mean background *Clarkia* density. Bars represent the 95% confidence interval for each

775 estimate.

776

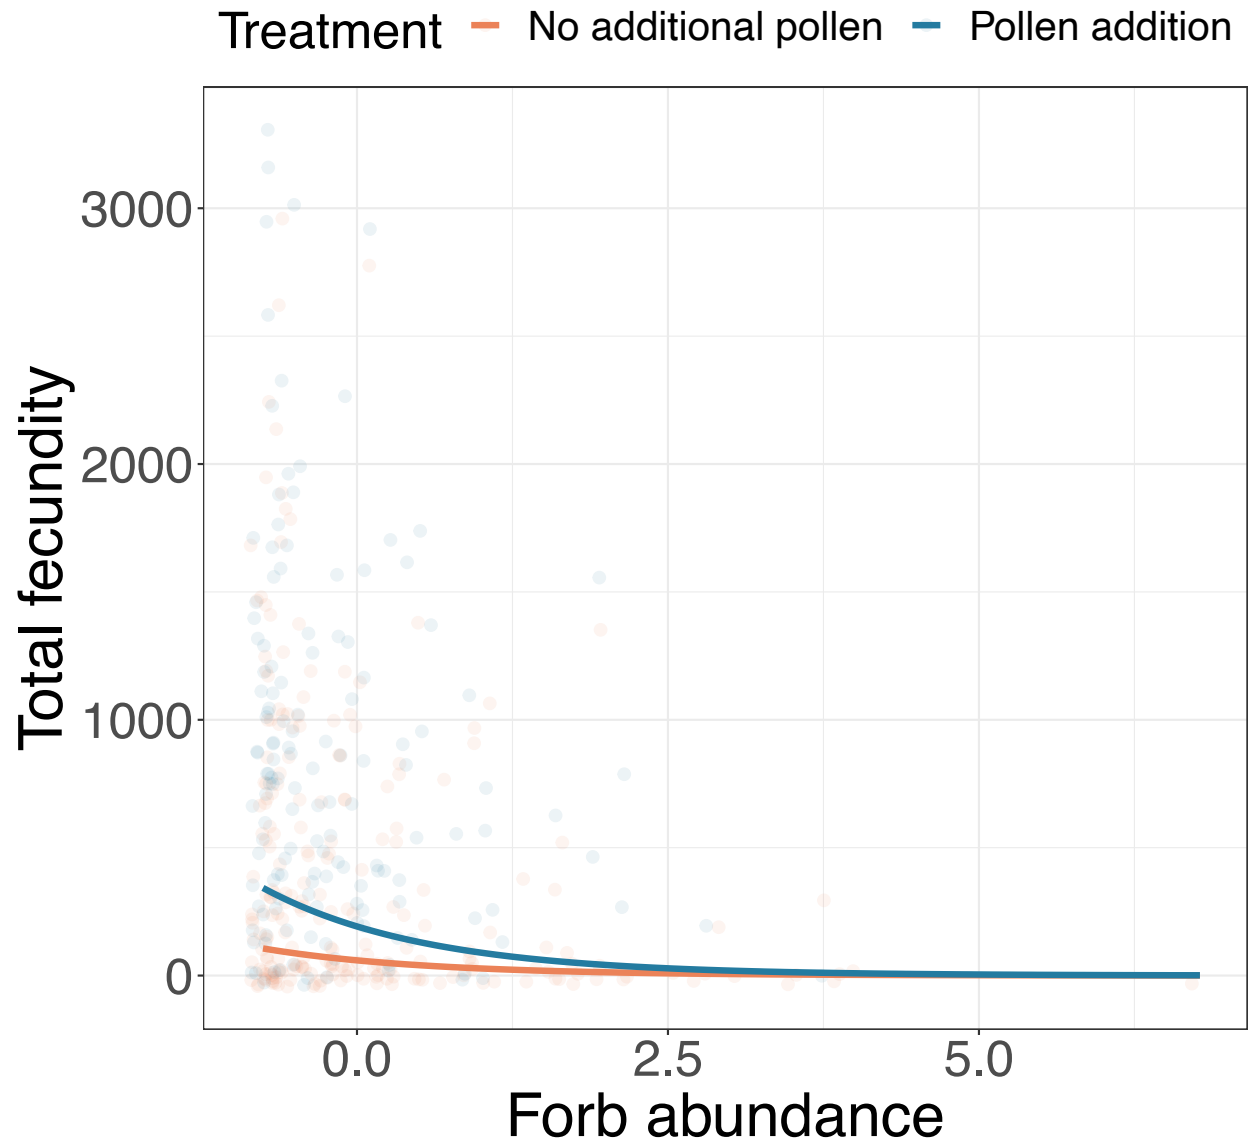

777

778 Figure 4. Predicted full-plant seed set as a function of pollination treatment and the number of  
779 non-*Clarkia* forbs surrounding the focal as a seedling.

780

781

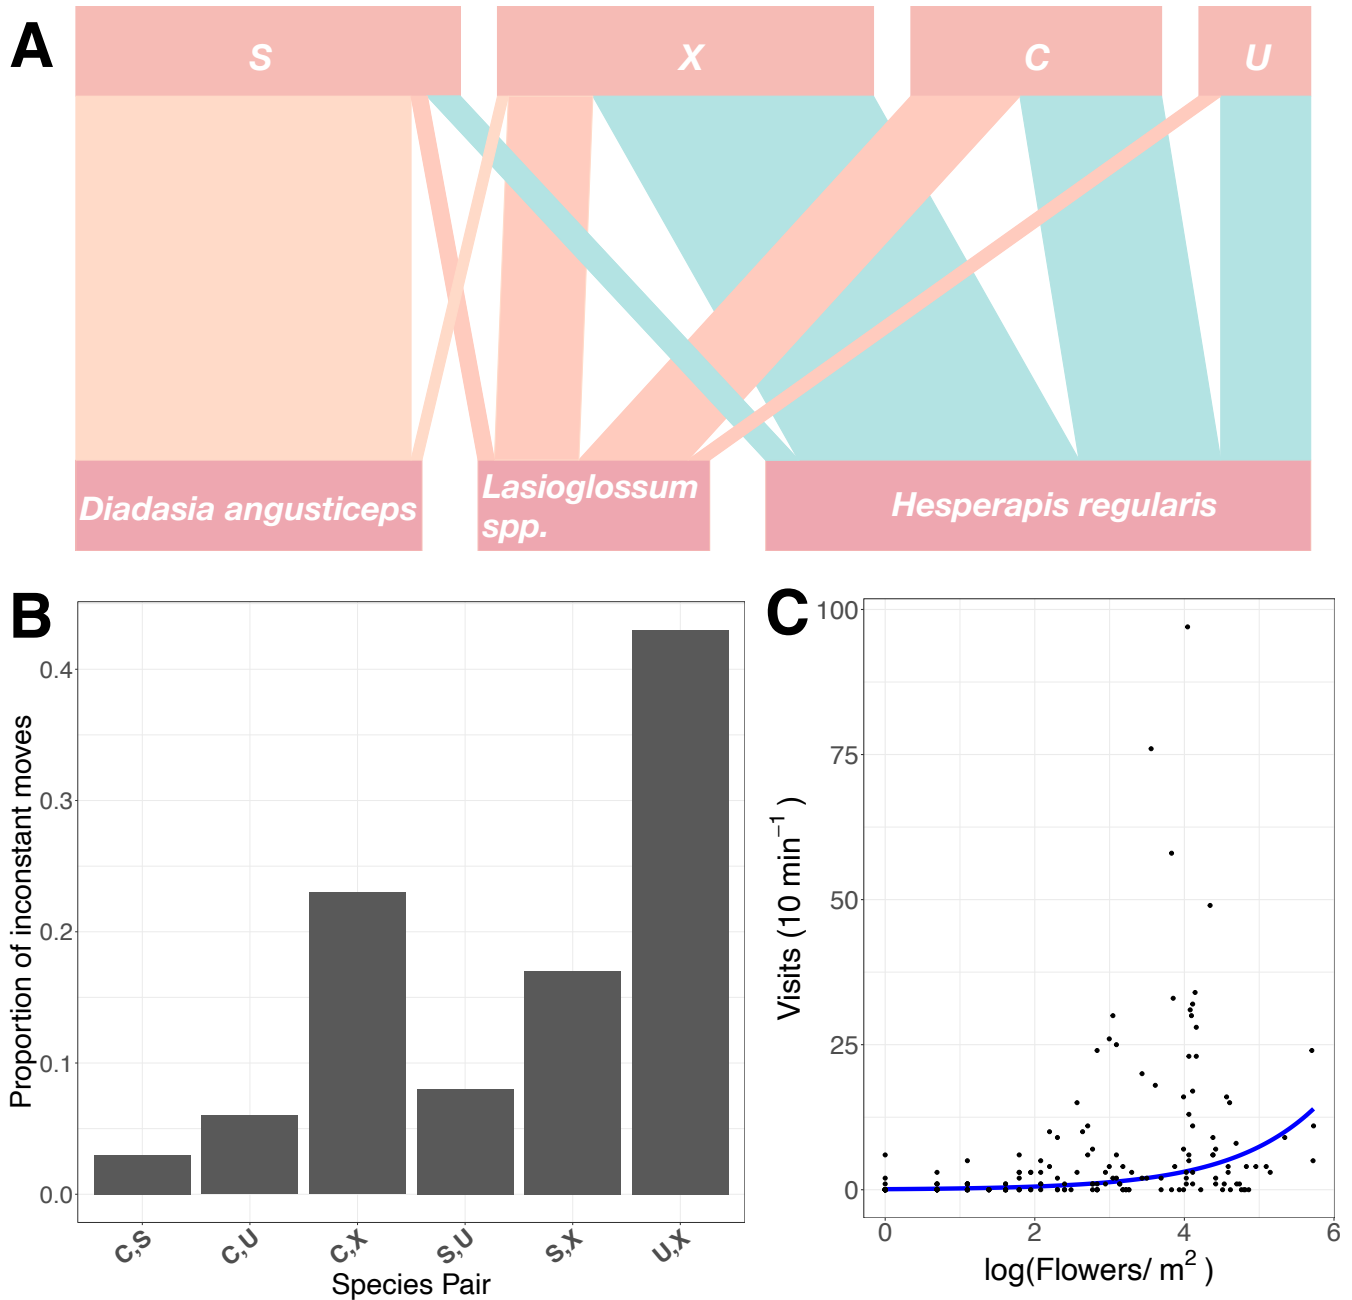

C: *C. cylindrica*; S: *C. speciosa*; U: *C. unguiculata*; X: *C. xantiana*

782

783 Figure 5. (A) The network of the plant and pollinator interactions observed during the pairwise

784 interaction experiment. (B) The proportion of inconstant moves for each transition type between

785 different *Clarkia* in the experimental arrays. (C) Rate of visitation as a function of floral

786 abundance in the interaction plots.

787 Table 1. The effect of pollinators on seed set in the density dependent interactions between  
 788 *Clarkia* species (Figure 1), and the suggested explanation of the change in terms of observed  
 789 pollinator behaviors (Figure 3). Only statistically significant pairwise interactions are shown in  
 790 this table.

| Background                                  | Focal                                       | Change in density<br>dependent effect<br>of background on<br>focal $\pm$ SE | Interpretation                                                   | Behavioral<br>Explanation                                                                                 | p-<br>value         |
|---------------------------------------------|---------------------------------------------|-----------------------------------------------------------------------------|------------------------------------------------------------------|-----------------------------------------------------------------------------------------------------------|---------------------|
| <i>Clarkia</i><br><i>unguiculata</i><br>(U) | <i>Clarkia</i><br><i>xantiana</i><br>(X)    | 4.88 $\pm$ 0.93                                                             | Pollinators<br>alleviate the<br>competitive<br>effect of U on X  | Joint attraction to<br>higher densities,<br>but pollinator<br>preference for <i>C.</i><br><i>xantiana</i> | <<br>0.001<br>(***) |
| <i>Clarkia</i><br><i>cylindrica</i><br>(C)  | <i>Clarkia</i><br><i>xantiana</i><br>(X)    | -0.72 $\pm$ 0.21                                                            | Pollinators<br>exacerbate the<br>competitive<br>effect of C on X | Incompatible<br>pollen transfer                                                                           | 0.0011<br>(**)      |
| <i>Clarkia</i><br><i>xantiana</i><br>(X)    | <i>Clarkia</i><br><i>unguiculata</i><br>(U) | -0.44 $\pm$ 0.21                                                            | Pollinators<br>exacerbate the<br>competitive<br>effect of X on U | Pollinator<br>preference for <i>C.</i><br><i>xantiana</i> and<br>incompatible<br>pollen transfer          | 0.039<br>(*)        |

|                                |                                  |              |                                                                 |                                                                              |                |
|--------------------------------|----------------------------------|--------------|-----------------------------------------------------------------|------------------------------------------------------------------------------|----------------|
| <i>Clarkia speciosa</i><br>(S) | <i>Clarkia speciosa</i><br>(S)   | 1.40 ± 1.48  | Pollinators<br>alleviate the<br>competitive<br>effect of S on S | Pollinator<br>attraction to higher<br>densities                              | 0.0091<br>(**) |
| <i>Clarkia speciosa</i><br>(S) | <i>Clarkia cylindrica</i><br>(C) | -1.41 ± 0.53 | Pollinators<br>reduce the<br>facilitative effect<br>of S on C   | Low pollinator<br>overlap and<br>therefore low<br>pollinator service<br>to C | 0.0073<br>(**) |

791
